# Supplementary material for: Biological Assay-Guided Fractionation and Mass Spectrometry-Based Metabolite Profiling of Annona muricata L. Cytotoxic Compounds against Lung Cancer A549 Cell Line
Source: MDPI journal article supplement (doi:10.3390/plants11182380), 2022-09-12
Supplement: s1 [file s1]

**Table S1.** Masses of obtained fractions from the purification of *Annona muricata*.

| Sample Code           | Mass of Fraction (g) | Mass of Fraction (mg) |
|-----------------------|----------------------|-----------------------|
| 1st Purification      |                      |                       |
| GE_crude              | 0.0028               | 2.8                   |
| GE_P1_B2_F17          | 0.0035               | 3.5                   |
| GE_P1_B2_F18          | 0.0043               | 4.3                   |
| GE_P1_B2_F19          | 0.0008               | 0.8                   |
| GE_P1_B2_F20          | 0.0016               | 1.6                   |
| GE_P1_B2_F21          | 0.0017               | 1.7                   |
| A                     | 0.0002               | 0.2                   |
| B                     | 0.0001               | 0.1                   |
| C                     | 0.0001               | 0.1                   |
| D                     | 1E-04                | 0.1                   |
| E                     | 1E-04                | 0.1                   |
| F                     | 0.0047               | 4.7                   |
| G                     | 0.0006               | 0.6                   |
| H                     | 0.0001               | 0.1                   |
| GE_P2_B3_F20_F16      | 0.0012               | 1.2                   |
| GE_P1_B3_F20          | 0.0009               | 0.9                   |
| F15 and F17 fractions |                      |                       |
| GE_P3_B3_F17_12_A     | 0.0016               | 1.6                   |
| GE_P3_B3_F17_12_B     | 0.0005               | 0.5                   |
| GE_P3_B3_F17_12_C     | 0.0004               | 0.4                   |
| GE_P3_B3_F17_12_D     | 0.0005               | 0.5                   |
| GE_P3_B3_F17_12_E     | 0.0007               | 0.7                   |
| GE_P3_B3_F17_12_F     | 0.0011               | 1.1                   |
| GE_P3_B3_F17_12_G     | 0.0009               | 0.9                   |
| GE_P3_B3_F17_12_H     | 0.001                | 1                     |
| GE_P3_B3_F17_12_I     | 0.0003               | 0.3                   |
| GE_P2_B4_F17_F12      | 0.0018               | 1.8                   |
| GE_P1_B4_F17          | 0.0013               | 1.3                   |
| F15-F16 fractions     |                      |                       |
| GE_P1_B234_F15        | 0.0039               | 3.9                   |
| GE_P2_B234_F15_F9     | 0.0008               | 0.8                   |
| GE_P2_B234_F15_F10    | 0.0004               | 0.4                   |
| GE_P2_B234_F15_F11    | 0.0006               | 0.6                   |
| GE_P2_B234_F15_F12    | 0.0005               | 0.5                   |

|                    |        |     |
|--------------------|--------|-----|
| GE_P2_B234_F15_F13 | 0.0053 | 5.3 |
| GE_P2_B234_F15_F14 | 0.0023 | 2.3 |
| GE_P2_B234_F15_F15 | 0.0018 | 1.8 |
| GE_P2_B234_F15_F16 | 0.0038 | 3.8 |
| GE_P2_B234_F15_F17 | 0.0014 | 1.4 |
| GE_P2_B234_F15_F18 | 0.0004 | 0.4 |
| GE_P2_B234_F15_F19 | 0.0001 | 0.1 |

| Align<br>ment<br>ID | Relative Intensity Per Fraction                                  | Relative Intensity in<br>Active and Inactive<br>Fractions      |
|---------------------|------------------------------------------------------------------|----------------------------------------------------------------|
| 13271               | <p><b>ID 13271</b></p> <p>Fractions from ELS_GE_P2_B2_F18_11</p> | <p><b>ID 13271</b></p> <p>Active and Inactive GE fractions</p> |
| 12388               | <p><b>ID 12388</b></p> <p>Fractions from ELS_GE_P2_B2_F18_11</p> | <p><b>ID 12388</b></p> <p>Active and Inactive GE fractions</p> |
| 12357               | <p><b>ID 12357</b></p> <p>Fractions from ELS_GE_P2_B2_F18_11</p> | <p><b>ID 12357</b></p> <p>Active and Inactive GE fractions</p> |
| 12376               | <p><b>ID 12376</b></p> <p>Fractions from ELS_GE_P2_B2_F18_11</p> | <p><b>ID 12376</b></p> <p>Active and Inactive GE fractions</p> |

| Align<br>ment<br>ID | Relative Intensity Per Fraction                                                                                                                                                                                                                                                                                                                                                                          | Relative Intensity in<br>Active and Inactive<br>Fractions                                                       |
|---------------------|----------------------------------------------------------------------------------------------------------------------------------------------------------------------------------------------------------------------------------------------------------------------------------------------------------------------------------------------------------------------------------------------------------|-----------------------------------------------------------------------------------------------------------------|
| 3078                | <p><b>ID 3078</b></p> <p>Relative Intensity</p> <p>Fractions from ELS_GE_P2_B2_F18_11</p> <p>ELS_GE_P3_B2_F18_11A<br/>ELS_GE_P3_B2_F18_11B<br/>ELS_GE_P3_B2_F18_11C<br/>ELS_GE_P3_B2_F18_11D<br/>ELS_GE_P3_B2_F18_11E<br/>ELS_GE_P3_B2_F18_11F<br/>ELS_GE_P3_B2_F18_11G<br/>ELS_GE_P3_B2_F18_11H<br/>ELS_GE_P3_B2_F18_11I<br/>ELS_GE_P3_B2_F18_11J<br/>ELS_GE_P3_B2_F18_11K<br/>ELS_GE_P3_B2_F18_11L</p> | <p><b>ID 3078</b></p> <p>Relative Intensity</p> <p>ACTIVE INACTIVE</p> <p>Active and Inactive GE fractions</p>  |
| 13297               | <p><b>ID 13297</b></p> <p>Relative Intensity</p> <p>Fractions from ELS_GE_P2_B2_F18_11</p> <p>ELS_GE_P3_B2_F18_11A<br/>ELS_GE_P3_B2_F18_11B<br/>ELS_GE_P3_B2_F18_11C<br/>ELS_GE_P3_B2_F18_11D<br/>ELS_GE_P3_B2_F18_11E<br/>ELS_GE_P3_B2_F18_11F<br/>ELS_GE_P3_B2_F18_11G<br/>ELS_GE_P3_B2_F18_11H<br/>ELS_GE_P3_B2_F18_11I<br/>ELS_GE_P3_B2_F18_11J<br/>ELS_GE_P3_B2_F18_11K</p>                         | <p><b>ID 13297</b></p> <p>Relative Intensity</p> <p>ACTIVE INACTIVE</p> <p>Active and Inactive GE fractions</p> |
| 12369               | <p><b>ID 12369</b></p> <p>Relative Intensity</p> <p>Fractions from ELS_GE_P2_B2_F18_11</p> <p>ELS_GE_P3_B2_F18_11A<br/>ELS_GE_P3_B2_F18_11B<br/>ELS_GE_P3_B2_F18_11C<br/>ELS_GE_P3_B2_F18_11D<br/>ELS_GE_P3_B2_F18_11E<br/>ELS_GE_P3_B2_F18_11F<br/>ELS_GE_P3_B2_F18_11G<br/>ELS_GE_P3_B2_F18_11H<br/>ELS_GE_P3_B2_F18_11I<br/>ELS_GE_P3_B2_F18_11J</p>                                                  | <p><b>ID 12369</b></p> <p>Relative Intensity</p> <p>ACTIVE INACTIVE</p> <p>Active and Inactive GE fractions</p> |

|                  |                                                                  |                                                                |
|------------------|------------------------------------------------------------------|----------------------------------------------------------------|
| 11145            | <p><b>ID 11145</b></p> <p>Fractions from ELS_GE_P2_B2_F18_11</p> | <p><b>ID 11145</b></p> <p>Active and Inactive GE fractions</p> |
| Alignm<br>ent ID | Relative Intensity Per Fraction                                  | Relative Intensity in Active<br>and Inactive Fractions         |
| 12433            | <p><b>ID 12433</b></p> <p>Fractions from ELS_GE_P2_B2_F18_11</p> | <p><b>ID 12433</b></p> <p>Active and Inactive GE fractions</p> |
| 12422            | <p><b>ID 12422</b></p> <p>Fractions from ELS_GE_P2_B2_F18_11</p> | <p><b>ID 12422</b></p> <p>Active and Inactive GE fractions</p> |
| 11920            | <p><b>ID 11920</b></p> <p>Fractions from ELS_GE_P2_B2_F18_11</p> | <p><b>ID 11920</b></p> <p>Active and Inactive GE fractions</p> |

|                     |                                                                  |                                                                |
|---------------------|------------------------------------------------------------------|----------------------------------------------------------------|
| 11996               | <p><b>ID 11996</b></p> <p>Fractions from ELS_GE_P2_B2_F18_11</p> | <p><b>ID 11996</b></p> <p>Active and Inactive GE fractions</p> |
| Align<br>ment<br>ID | Relative Intensity Per Fraction                                  | Relative Intensity in<br>Active and Inactive<br>Fractions      |
| 11931               | <p><b>ID 11931</b></p> <p>Fractions from ELS_GE_P2_B2_F18_11</p> | <p><b>ID 11931</b></p> <p>Active and Inactive GE fractions</p> |
| 12363               | <p><b>ID 12363</b></p> <p>Fractions from ELS_GE_P2_B2_F18_11</p> | <p><b>ID 12363</b></p> <p>Active and Inactive GE fractions</p> |
| 13254               | <p><b>ID 13254</b></p> <p>Fractions from ELS_GE_P2_B2_F18_11</p> | <p><b>ID 13254</b></p> <p>Active and Inactive GE fractions</p> |

|                   |                                                                                                                                                                                                                                                                                                       |                                                                                                                 |
|-------------------|-------------------------------------------------------------------------------------------------------------------------------------------------------------------------------------------------------------------------------------------------------------------------------------------------------|-----------------------------------------------------------------------------------------------------------------|
| 10417             | <p><b>ID 10417</b></p> <p>Relative Intensity</p> <p>Fractions from ELS_GE_P2_B2_F18_11</p> <p>ELS_GE_P3_B2_F18_11A<br/>ELS_GE_P3_B2_F18_11B<br/>ELS_GE_P3_B2_F18_11C<br/>ELS_GE_P3_B2_F18_11D<br/>ELS_GE_P3_B2_F18_11E<br/>ELS_GE_P3_B2_F18_11F<br/>ELS_GE_P3_B2_F18_11G<br/>ELS_GE_P3_B2_F18_11H</p> | <p><b>ID 10417</b></p> <p>Relative Intensity</p> <p>ACTIVE INACTIVE</p> <p>Active and Inactive GE fractions</p> |
| Align-<br>ment ID | Relative Intensity Per Fraction                                                                                                                                                                                                                                                                       | Relative Intensity in<br>Active and Inactive<br>Fractions                                                       |
| 13144             | <p><b>ID 13144</b></p> <p>Relative Intensity</p> <p>Fractions from ELS_GE_P2_B2_F18_11</p> <p>ELS_GE_P3_B2_F18_11A<br/>ELS_GE_P3_B2_F18_11B<br/>ELS_GE_P3_B2_F18_11C<br/>ELS_GE_P3_B2_F18_11D<br/>ELS_GE_P3_B2_F18_11E<br/>ELS_GE_P3_B2_F18_11F<br/>ELS_GE_P3_B2_F18_11G<br/>ELS_GE_P3_B2_F18_11H</p> | <p><b>ID 13144</b></p> <p>Relative Intensity</p> <p>ACTIVE INACTIVE</p> <p>Active and Inactive GE fractions</p> |
| 11923             | <p><b>ID 11923</b></p> <p>Relative Intensity</p> <p>Fractions from ELS_GE_P2_B2_F18_11</p> <p>ELS_GE_P3_B2_F18_11A<br/>ELS_GE_P3_B2_F18_11B<br/>ELS_GE_P3_B2_F18_11C<br/>ELS_GE_P3_B2_F18_11D<br/>ELS_GE_P3_B2_F18_11E<br/>ELS_GE_P3_B2_F18_11F<br/>ELS_GE_P3_B2_F18_11G<br/>ELS_GE_P3_B2_F18_11H</p> | <p><b>ID 11923</b></p> <p>Relative Intensity</p> <p>ACTIVE INACTIVE</p> <p>Active and Inactive GE fractions</p> |
| 9844              | <p><b>ID 9844</b></p> <p>Relative Intensity</p> <p>Fractions from ELS_GE_P2_B2_F18_11</p> <p>ELS_GE_P3_B2_F18_11A<br/>ELS_GE_P3_B2_F18_11B<br/>ELS_GE_P3_B2_F18_11C<br/>ELS_GE_P3_B2_F18_11D<br/>ELS_GE_P3_B2_F18_11E<br/>ELS_GE_P3_B2_F18_11F<br/>ELS_GE_P3_B2_F18_11G<br/>ELS_GE_P3_B2_F18_11H</p>  | <p><b>ID 9844</b></p> <p>Relative Intensity</p> <p>ACTIVE INACTIVE</p> <p>Active and Inactive GE fractions</p>  |

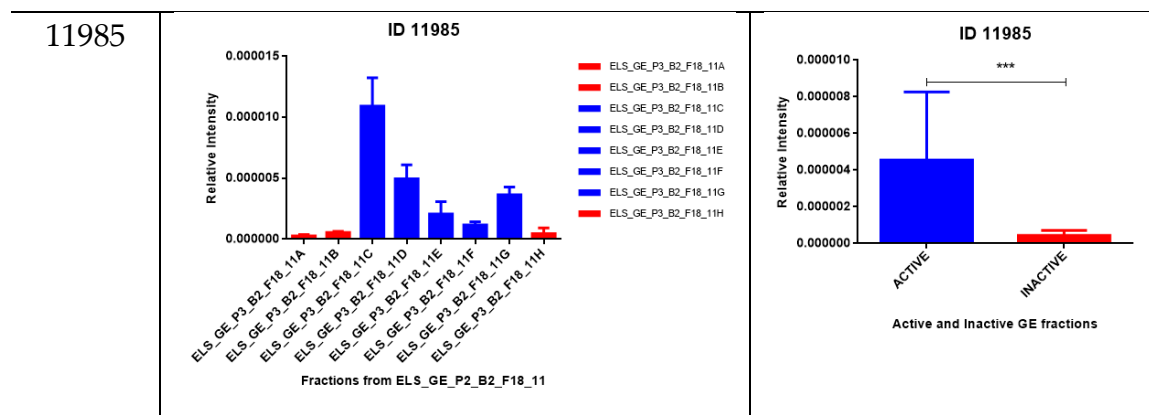

**Figure S1.** Putative compounds in F15-16 and their relative intensities (from MetaboAnalyst analysis)



| Alignment ID | Relative Intensity Per Fraction                                  | Relative Intensity in Active and Inactive Fractions            |
|--------------|------------------------------------------------------------------|----------------------------------------------------------------|
| 15623        | <p><b>ID 15623</b></p> <p>Fractions from ELS_GE_P2_B2_F19_12</p> | <p><b>ID 15623</b></p> <p>Active and Inactive GE fractions</p> |
| 14263        | <p><b>ID 14263</b></p> <p>Fractions from ELS_GE_P2_B2_F19_12</p> | <p><b>ID 14263</b></p> <p>Active and Inactive GE fractions</p> |
| 3653         | <p><b>ID 3653</b></p> <p>Fractions from ELS_GE_P2_B2_F19_12</p>  | <p><b>ID 3653</b></p> <p>Active and Inactive GE fractions</p>  |

|              |                                                                                            |                                                                                                                 |
|--------------|--------------------------------------------------------------------------------------------|-----------------------------------------------------------------------------------------------------------------|
| 17871        | <p><b>ID 17871</b></p> <p>Relative Intensity</p> <p>Fractions from ELS_GE_P2_B2_F19_12</p> | <p><b>ID 17871</b></p> <p>Relative Intensity</p> <p>ACTIVE INACTIVE</p> <p>Active and Inactive GE fractions</p> |
| Alignment ID | Relative Intensity Per Fraction                                                            | Relative Intensity in Active and Inactive Fractions                                                             |
| 3618         | <p><b>ID 3618</b></p> <p>Relative Intensity</p> <p>Fractions from ELS_GE_P2_B2_F19_12</p>  | <p><b>ID 3618</b></p> <p>Relative Intensity</p> <p>ACTIVE INACTIVE</p> <p>Active and Inactive GE fractions</p>  |
| 14942        | <p><b>ID 14942</b></p> <p>Relative Intensity</p> <p>Fractions from ELS_GE_P2_B2_F19_12</p> | <p><b>ID 14942</b></p> <p>Relative Intensity</p> <p>ACTIVE INACTIVE</p> <p>Active and Inactive GE fractions</p> |

|              |                                                                  |                                                                |
|--------------|------------------------------------------------------------------|----------------------------------------------------------------|
| 3722         | <p><b>ID 3722</b></p> <p>Fractions from ELS_GE_P2_B2_F19_12</p>  | <p><b>ID 3722</b></p> <p>Active and Inactive GE fractions</p>  |
| 1551         | <p><b>ID 1551</b></p> <p>Fractions from ELS_GE_P2_B2_F19_12</p>  | <p><b>ID 1551</b></p> <p>Active and Inactive GE fractions</p>  |
| Alignment ID | Relative Intensity Per Fraction                                  | Relative Intensity in Active and Inactive Fractions            |
| 19912        | <p><b>ID 19912</b></p> <p>Fractions from ELS_GE_P2_B2_F19_12</p> | <p><b>ID 19912</b></p> <p>Active and Inactive GE fractions</p> |
| 14387        | <p><b>ID 14387</b></p> <p>Fractions from ELS_GE_P2_B2_F19_12</p> | <p><b>ID 14387</b></p> <p>Active and Inactive GE fractions</p> |

|              |                                                                  |                                                                |
|--------------|------------------------------------------------------------------|----------------------------------------------------------------|
| 14941        | <p><b>ID 14941</b></p> <p>Fractions from ELS_GE_P2_B2_F19_12</p> | <p><b>ID 14941</b></p> <p>Active and inactive GE fractions</p> |
| 17456        | <p><b>ID 17456</b></p> <p>Fractions from ELS_GE_P2_B2_F19_12</p> | <p><b>ID 17456</b></p> <p>Active and inactive GE fractions</p> |
| Alignment ID | Relative Intensity Per Fraction                                  | Relative Intensity in Active and Inactive Fractions            |
| 5453         | <p><b>ID 5453</b></p> <p>Fractions from ELS_GE_P2_B2_F19_12</p>  | <p><b>ID 5453</b></p> <p>Active and inactive GE fractions</p>  |
| 19882        | <p><b>ID 19882</b></p> <p>Fractions from ELS_GE_P2_B2_F19_12</p> | <p><b>ID 19882</b></p> <p>Active and inactive GE fractions</p> |

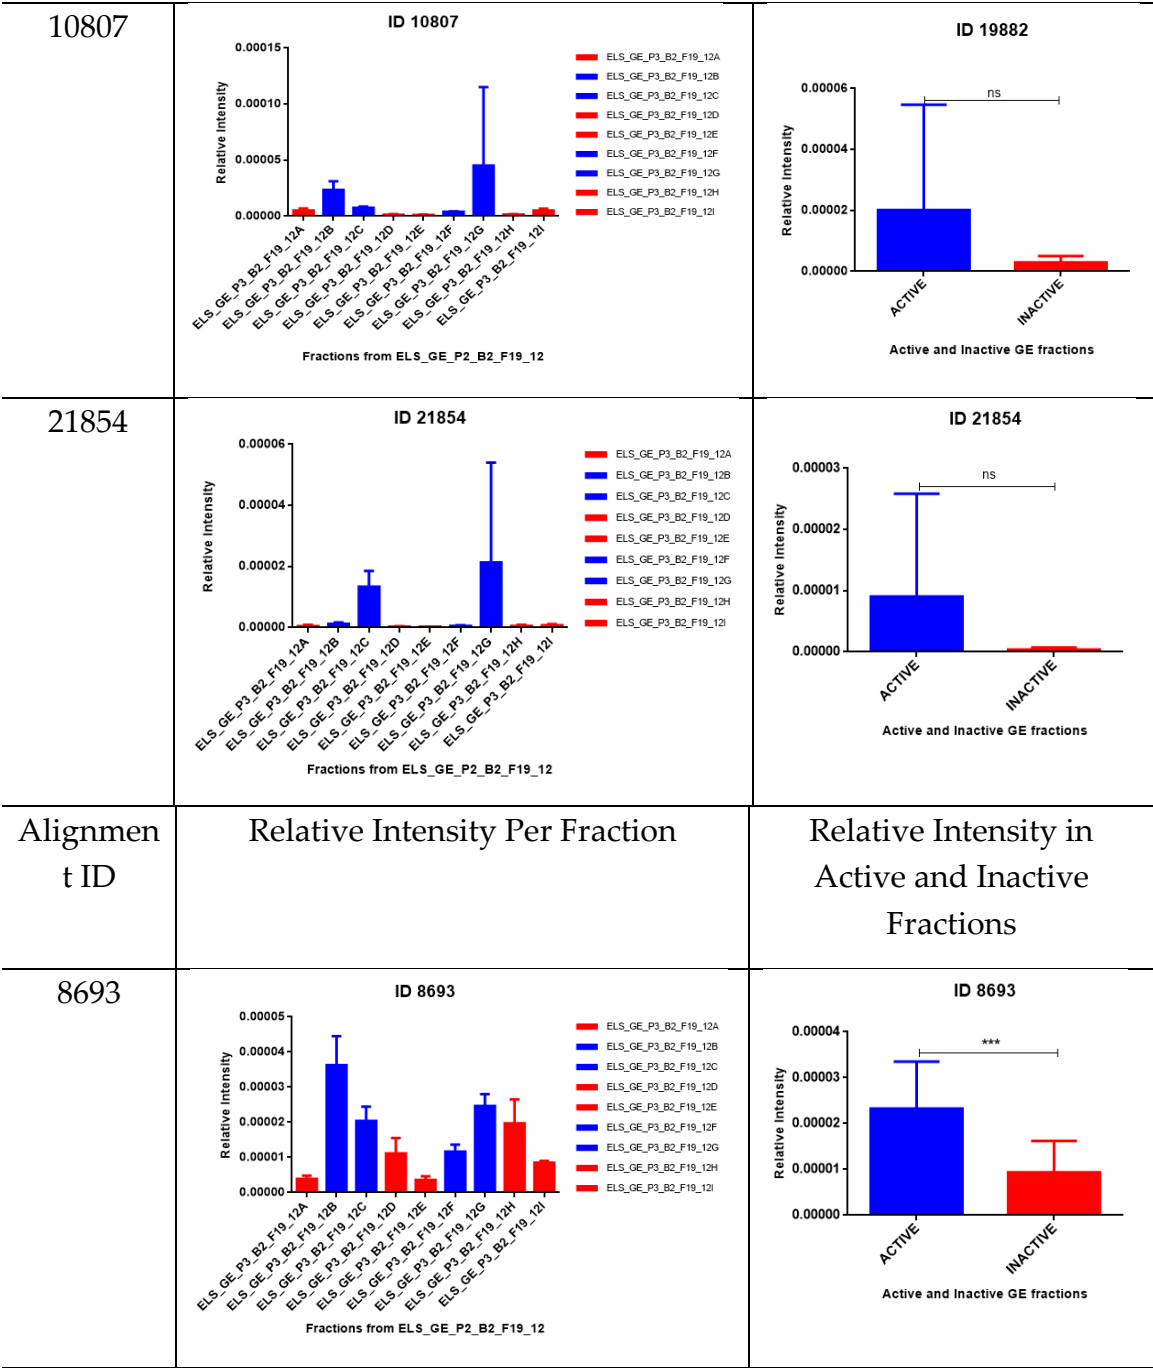

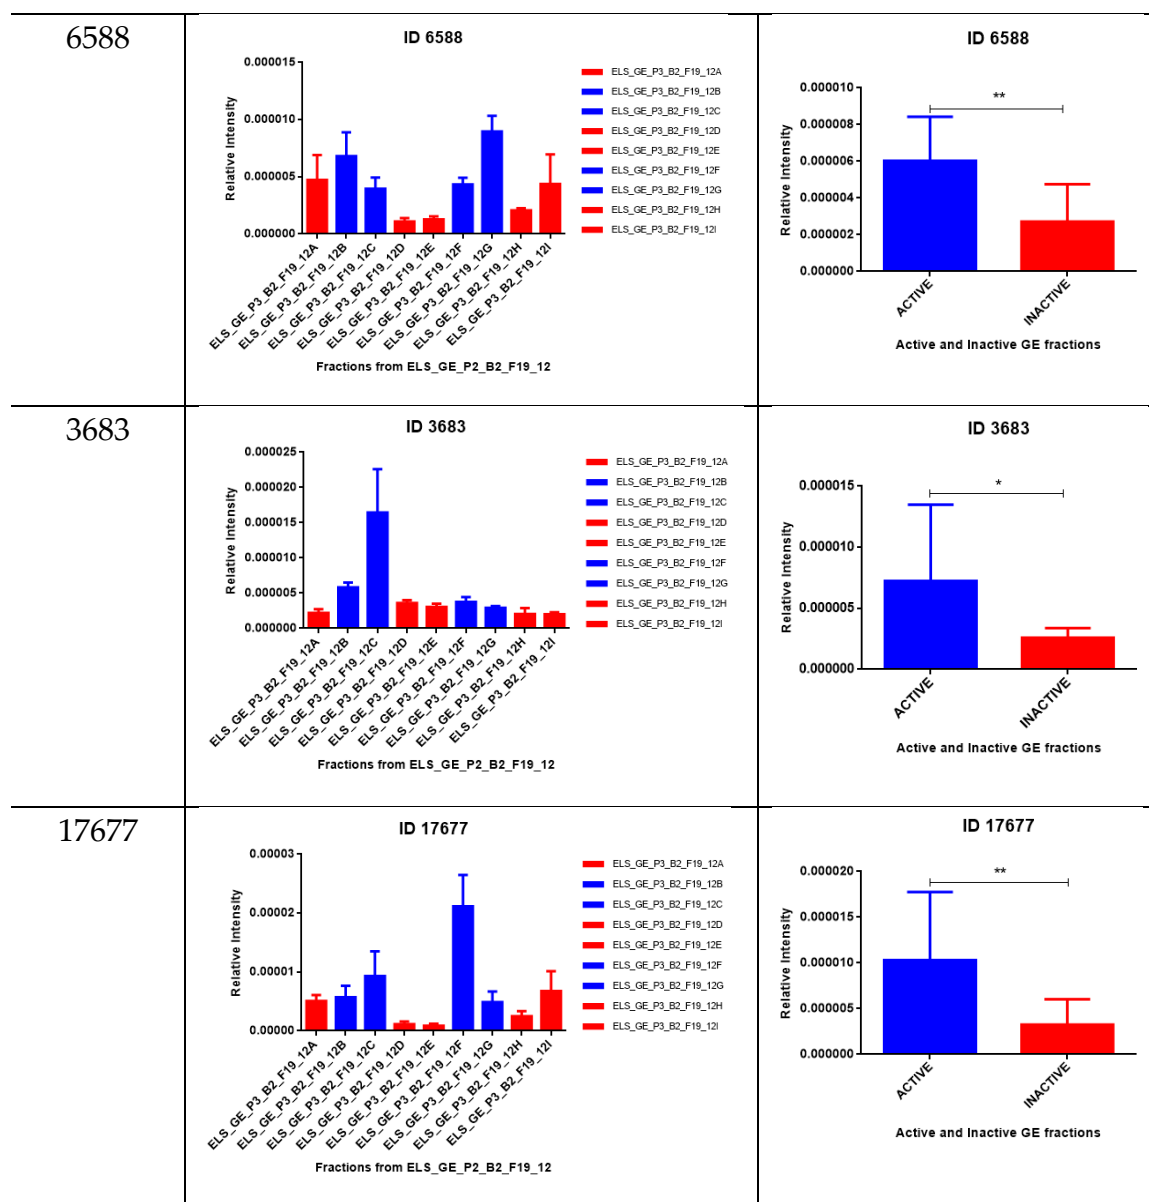

**Figure S2.** Putative compounds in F15-17 and their relative intensities (from MetaboAnalyst analysis).
